# Supplementary material
Source: ML conference proceedings conference paper supplement (https://openreview.net/forum?id=CGTnDiL01P)
Supplement: supplementary_material [file appendix.pdf › supplementary/appendix.pdf]

## Appendix

In this appendix, we follow the notation introduced before. However, in order to reduce the complexity of the derivation, we simplify all the coefficient with Kronecker product. For example  $\mathbf{A}_t := \mathbf{A}_t \otimes \mathbf{I}_d$ ,  $\boldsymbol{\mu}_t := \boldsymbol{\mu}_t \otimes \mathbf{I}_d$ .

### A Proof of Proposition 3.1

*Proof.* We first analyze the objective function of momentum diffusion model for  $N = 2$  case, and it can be generalize to larger  $N$ .

$$\min_{\theta} \mathcal{L}_{\text{MDM}}(\theta) = \mathbb{E}_{x_1, \epsilon, t} \|\epsilon_{\theta}(\mathbf{x}_t, t) - \epsilon^{(1)}\|_2^2 \quad (6)$$

$$= \mathbb{E}_{x_1, \epsilon, t} \frac{1}{L_t^{vv2}} \|L_t^{vv} \epsilon_{\theta}(\mathbf{x}_t, t) - L_t^{vv} \epsilon^{(1)}\|_2^2 \quad (7)$$

$$= \mathbb{E}_{x_1, \epsilon, t} \frac{1}{L_t^{vv2}} \|L_t^{vv} \epsilon_{\theta}(\mathbf{x}_t, t) - \left[ x_t^{(1)} - \frac{L_t^{xv}}{L_t^{xx}} x_t^{(0)} - \left( \boldsymbol{\mu}_t^{(0)} - \frac{L_t^{xv}}{L_t^{xx}} \boldsymbol{\mu}_t^{(1)} \right) x_1 \right]\|_2^2 \quad (8)$$

$$= \mathbb{E}_{x_1, \epsilon, t} \frac{1}{L_t^{vv2}} \|L_t^{vv} \epsilon_{\theta}(\mathbf{x}_t, t) - x_t^{(1)} + \frac{L_t^{xv}}{L_t^{xx}} x_t^{(0)} - \left( \frac{L_t^{xv}}{L_t^{xx}} \boldsymbol{\mu}_t^{(1)} - \boldsymbol{\mu}_t^{(0)} \right) x_1\|_2^2 \quad (9)$$

$$= \mathbb{E}_{x_1, \epsilon, t} \frac{\left( \frac{L_t^{xv}}{L_t^{xx}} \boldsymbol{\mu}_t^{(1)} - \boldsymbol{\mu}_t^{(0)} \right)^2}{L_t^{vv2}} \left\| \underbrace{\frac{L_t^{vv} \epsilon_{\theta}(\mathbf{x}_t, t) - x_t^{(1)} + \frac{L_t^{xv}}{L_t^{xx}} x_t^{(0)}}{\frac{L_t^{xv}}{L_t^{xx}} \boldsymbol{\mu}_t^{(1)} - \boldsymbol{\mu}_t^{(0)}}}_{\text{parameterized Neural Netowrk}} - x_1 \right\|_2^2 \quad (10)$$

Following the same spirit, one can derive the case for  $N$  variable. See Appendix B for details.

We know that,

$$\mathbf{x}_t \mid x_1 \sim \mathcal{N}(\boldsymbol{\mu}_t x_1, \boldsymbol{\Sigma}_t),$$

Define

$$\mathbf{r}_t := \frac{\boldsymbol{\Sigma}_t^{-1} \boldsymbol{\mu}_t}{\boldsymbol{\mu}_t^{\top} \boldsymbol{\Sigma}_t^{-1} \boldsymbol{\mu}_t}, \quad y_t := \mathbf{r}_t^{\top} \mathbf{x}_t,$$

and the residual (“noise”)

$$\epsilon := \mathbf{x}_t - y_t \boldsymbol{\mu}_t.$$

Since the operation is linear, one can transform the  $\mathbf{x}_t$  by

$$T : \mathbf{x}_t \mapsto (y_t, \epsilon) = \left( \mathbf{r}_t^{\top} \mathbf{x}_t, \mathbf{x}_t - \frac{(\mathbf{r}_t^{\top} \mathbf{x}_t)}{\alpha_t} \boldsymbol{\mu}_t \right)$$

and it is *invertible* with linear inverse  $\mathbf{x}_t = y_t \boldsymbol{\mu}_t + \epsilon$ . Hence the  $\sigma$ -algebras coincide:

$$\sigma(\mathbf{x}_t) = \sigma(y_t, \epsilon).$$

For any integrable random variable  $Z$ , equal  $\sigma$ -fields imply  $\mathbb{E}[Z \mid \mathbf{x}_t] = \mathbb{E}[Z \mid y_t, \epsilon]$ . Taking  $Z = x_1$  yields

$$\mathbb{E}[x_1 \mid \mathbf{x}_t] = \mathbb{E}[x_1 \mid y_t, \epsilon].$$

due to the fact that  $\epsilon$  is the independent gaussian, thus

$$\mathbb{E}[x_1 \mid \mathbf{x}_t] = \mathbb{E}[x_1 \mid y_t, \epsilon] = \mathbb{E}[x_1 \mid y_t, \epsilon] = \mathbb{E}[x_1 \mid y_t].$$

□

### B Proof of Proposition 3.3

*Proof.* The dynamics we considered reads

$$\frac{d\mathbf{x}_t}{dt} = \mathbf{A}_t \mathbf{x}_t + \mathbf{b}_t F_t, \quad x_0 \sim \mathcal{N}(0, I). \quad (11)$$

727 and again, in this paper, we only consider,

$$\mathbf{A}_t = \begin{bmatrix} 0 & 1 & 0 & \cdots & 0 \\ 0 & 0 & 1 & \cdots & 0 \\ \vdots & \vdots & \ddots & \ddots & \vdots \\ 0 & 0 & \cdots & 0 & 1 \\ 0 & 0 & \cdots & 0 & 0 \end{bmatrix}_{N \times N}, \text{ and } \mathbf{b}_t := \begin{bmatrix} 0 \\ 0 \\ \vdots \\ 1 \end{bmatrix} \quad (12)$$

728 If we expand the system, it basically represent:

$$dx_t^{(0)} = x_t^{(1)} dt \quad (13)$$

$$dx_t^{(1)} = x_t^{(2)} dt \quad (14)$$

$$\dots \quad (15)$$

$$dx_t^{(N-1)} = F_t dt \quad (16)$$

$$(17)$$

729 In our case, the  $F_t$  function is:

$$F_t := N! \frac{x_1 - \sum_{i=0}^{N-1} \frac{x_t^{(i)}}{i!} (1-t)^i}{(1-t)^N} \quad (18)$$

730 One can easily verify that, when  $N = 1$ , it actually degenerate to flow matching:

$$F_t := \frac{x_1 - \mathbf{x}_t}{1-t}, \text{ and} \quad (19)$$

$$dx_t^{(0)} = F_t dt \quad (20)$$

731 One can consider it as the higher augment dimension extension of flow matching model. And the  
732 magical part is that, we do not need to retrain model.

733 For better analysis, we rearrange the system:

$$\frac{d\mathbf{x}_t}{dt} = \mathbf{A}_t \mathbf{x}_t + \mathbf{b}_t F_t \quad (21)$$

$$= \mathbf{A}_t \mathbf{x}_t + \mathbf{b}_t N! \frac{x_1 - \sum_{i=0}^{N-1} \frac{x_t^{(i)}}{i!} (1-t)^i}{(1-t)^N} \quad (22)$$

$$= \mathbf{A}_t \mathbf{x}_t + \frac{\mathbf{b}_t N!}{(1-t)^N} x_1 - \frac{\mathbf{b}_t N! \sum_{i=0}^{N-1} \frac{x_t^{(i)}}{i!} (1-t)^i}{(1-t)^N} \quad (23)$$

$$= \mathbf{A}_t \mathbf{x}_t + \underbrace{\begin{bmatrix} 0 \\ 0 \\ \vdots \\ \frac{N!}{(1-t)^N} \end{bmatrix}}_{\hat{\mathbf{b}}_t} x_1 - \underbrace{\begin{bmatrix} 0 & 0 & \cdots & 0 \\ 0 & 0 & \cdots & 0 \\ \vdots & \vdots & \ddots & \vdots \\ \frac{(1-t)^0 N!}{0!(1-t)^N} & \frac{(1-t)^1 N!}{1!(1-t)^N} & \cdots & \frac{(1-t)^N N!}{(N-1)!(1-t)^N} \end{bmatrix}}_{\tilde{\mathbf{A}}_t} \mathbf{x}_t \quad (24)$$

$$:= \hat{\mathbf{A}}_t \mathbf{x}_t + \hat{\mathbf{b}}_t x_1, \quad (\hat{\mathbf{A}}_t := \mathbf{A}_t - \tilde{\mathbf{A}}_t) \quad (25)$$

734 Consider the linear time-varying system:

$$\frac{d\mathbf{x}_t}{dt} = \hat{\mathbf{A}}_t \mathbf{x}_t + \hat{\mathbf{b}}_t x_1, \quad \mathbf{x}_0 \sim \mathcal{N}(0, I). \quad (26)$$

735 Since (26) is linear and deterministic (apart from the random initial condition), the state remains  
736 Gaussian. Its mean and covariance evolve as follows [26].

737 **Mean Dynamics.** Let

$$\mathbf{m}_t = \mathbb{E}[\mathbf{x}_t].$$

738 Then

$$\dot{\mathbf{m}}_t = \hat{\mathbf{A}}_t \mathbf{m}_t + \hat{\mathbf{b}}_t x_1, \quad m_0 = 0. \quad (27)$$

739 We can write the mean in a factorized form as

$$\mathbf{m}_t = \boldsymbol{\mu}_t x_1,$$

740 so that by dividing by  $x_1$ , we obtain

$$\dot{\boldsymbol{\mu}}_t = \hat{\mathbf{A}}_t \boldsymbol{\mu}_t + \hat{\mathbf{b}}_t.$$

741 **Covariance Dynamics.** Similarly, the covariance follows dynamics

$$\dot{\boldsymbol{\Sigma}}_t = \hat{\mathbf{A}}_t \boldsymbol{\Sigma}_t + \boldsymbol{\Sigma}_t \hat{\mathbf{A}}_t^T \quad (28)$$

742 Recall that, Then we define the scalar quantity of interest as

$$y_t := \frac{\left(\boldsymbol{\Sigma}_t^{-1} \mathbf{m}_t\right)^T \mathbf{x}_t}{\left(\boldsymbol{\Sigma}_t^{-1} \mathbf{m}_t\right)^T \boldsymbol{\mu}_t} = \frac{\left(\boldsymbol{\Sigma}_t^{-1} \boldsymbol{\mu}_t\right)^T \mathbf{x}_t}{\boldsymbol{\mu}_t^T \boldsymbol{\Sigma}_t^{-1} \boldsymbol{\mu}_t} = \frac{\mathbf{r}_t^T \mathbf{x}_t}{\gamma_t}, \quad \text{with } \gamma_t := \boldsymbol{\mu}_t^T \boldsymbol{\Sigma}_t^{-1} \boldsymbol{\mu}_t. \quad (29)$$

743 We wish to compute the derivative of

$$y_t = \frac{\mathbf{r}_t^T \mathbf{x}_t}{\gamma_t},$$

744 Using the quotient rule,

$$\dot{y}_t = \frac{\frac{d}{dt}(\mathbf{r}_t^T \mathbf{x}_t) \gamma_t - (\mathbf{r}_t^T \mathbf{x}_t) \dot{\gamma}_t}{\gamma_t^2}.$$

745 Since  $\mathbf{r}_t^T \mathbf{x}_t = y_t \gamma_t$ , this becomes

$$\dot{y}_t = \frac{\dot{\mathbf{r}}_t^T \mathbf{x}_t + \mathbf{r}_t^T \dot{\mathbf{x}}_t}{\gamma_t} - y_t \frac{\dot{\gamma}_t}{\gamma_t}.$$

746 **Derivative of  $\mathbf{r}_t$**

747 Recall that

$$\mathbf{r}_t = \boldsymbol{\Sigma}_t^{-1} \boldsymbol{\mu}_t.$$

748 Differentiating gives

$$\dot{\mathbf{r}}_t = -\boldsymbol{\Sigma}_t^{-1} \dot{\boldsymbol{\Sigma}}_t \boldsymbol{\Sigma}_t^{-1} \boldsymbol{\mu}_t + \boldsymbol{\Sigma}_t^{-1} \dot{\boldsymbol{\mu}}_t.$$

749 Substitute the known dynamics:

$$\begin{aligned} \dot{\boldsymbol{\Sigma}}_t &= \hat{\mathbf{A}}_t \boldsymbol{\Sigma}_t + \boldsymbol{\Sigma}_t \hat{\mathbf{A}}_t^T, \\ \dot{\boldsymbol{\mu}}_t &= \hat{\mathbf{A}}_t \boldsymbol{\mu}_t + \hat{\mathbf{b}}_t. \end{aligned}$$

750 It follows that

$$\dot{\mathbf{r}}_t = -\boldsymbol{\Sigma}_t^{-1} \dot{\boldsymbol{\Sigma}}_t \boldsymbol{\Sigma}_t^{-1} \boldsymbol{\mu}_t + \boldsymbol{\Sigma}_t^{-1} \dot{\boldsymbol{\mu}}_t \quad (30)$$

$$= -\boldsymbol{\Sigma}_t^{-1} \left( \hat{\mathbf{A}}_t \boldsymbol{\Sigma}_t + \boldsymbol{\Sigma}_t \hat{\mathbf{A}}_t^T \right) \boldsymbol{\Sigma}_t^{-1} \boldsymbol{\mu}_t + \boldsymbol{\Sigma}_t^{-1} \left( \hat{\mathbf{A}}_t \boldsymbol{\mu}_t + \hat{\mathbf{b}}_t \right) \quad (31)$$

$$= -\boldsymbol{\Sigma}_t^{-1} \hat{\mathbf{A}}_t \boldsymbol{\mu}_t - \hat{\mathbf{A}}_t^T \boldsymbol{\Sigma}_t^{-1} \boldsymbol{\mu}_t + \boldsymbol{\Sigma}_t^{-1} \hat{\mathbf{A}}_t \boldsymbol{\mu}_t + \boldsymbol{\Sigma}_t^{-1} \hat{\mathbf{b}}_t \quad (32)$$

$$= -\hat{\mathbf{A}}_t^T \mathbf{r}_t + \boldsymbol{\Sigma}_t^{-1} \hat{\mathbf{b}}_t. \quad (33)$$

751 **Derivative of  $\mathbf{x}_t$**

752 From (26),

$$\dot{\mathbf{x}}_t = \hat{\mathbf{A}}_t \mathbf{x}_t + \hat{\mathbf{b}}_t \hat{x}_1.$$

753 **Derivative of  $\gamma_t$**

754 Recall

$$\gamma_t = \boldsymbol{\mu}_t^T \boldsymbol{\Sigma}_t^{-1} \boldsymbol{\mu}_t = \mathbf{r}_t^T \boldsymbol{\mu}_t.$$

755 Differentiating,

$$\dot{\gamma}_t = \dot{\mathbf{r}}_t^T \boldsymbol{\mu}_t + \mathbf{r}_t^T \dot{\boldsymbol{\mu}}_t.$$

756 Using (30) and  $\dot{\boldsymbol{\mu}}_t = \hat{\mathbf{A}}_t \boldsymbol{\mu}_t + \hat{\mathbf{b}}_t$ , one obtains (after cancellation) the result:

$$\dot{\gamma}_t = \left( -\hat{\mathbf{A}}_t^T \mathbf{r}_t + \boldsymbol{\Sigma}_t^{-1} \hat{\mathbf{b}}_t \right) \boldsymbol{\mu}_t + \mathbf{r}_t^T \left( \hat{\mathbf{A}}_t \boldsymbol{\mu}_t + \hat{\mathbf{b}}_t \right) \quad (34)$$

$$= 2 \hat{\mathbf{b}}_t^T \mathbf{r}_t \quad (35)$$

$$= 2 \hat{\mathbf{b}}_t^T \boldsymbol{\Sigma}_t^{-1} \boldsymbol{\mu}_t \quad (36)$$

757 **Combining Everything**

758 Substitute the pieces into

$$\dot{y}_t = \frac{\dot{\mathbf{r}}_t^T \mathbf{x}_t + \mathbf{r}_t^T \dot{\mathbf{x}}_t}{\gamma_t} - y_t \frac{\dot{\gamma}_t}{\gamma_t}.$$

759 Using

$$\begin{aligned} \dot{\mathbf{r}}_t^T &= -\mathbf{r}_t^T \hat{\mathbf{A}}_t + \hat{\mathbf{b}}_t^T \boldsymbol{\Sigma}_t^{-1}, \\ \mathbf{r}_t^T \dot{\mathbf{x}}_t &= \mathbf{r}_t^T (\hat{\mathbf{A}}_t \mathbf{x}_t + \hat{\mathbf{b}}_t \hat{x}_1), \end{aligned}$$

760 we have:

$$\begin{aligned} \dot{\mathbf{r}}_t^T \mathbf{x}_t + \mathbf{r}_t^T \dot{\mathbf{x}}_t &= \left[ -\mathbf{r}_t^T \hat{\mathbf{A}}_t \mathbf{x}_t + \hat{\mathbf{b}}_t^T \boldsymbol{\Sigma}_t^{-1} \mathbf{x}_t \right] + \left[ \mathbf{r}_t^T \hat{\mathbf{A}}_t \mathbf{x}_t + \mathbf{r}_t^T \hat{\mathbf{b}}_t \hat{x}_1 \right] \\ &= \hat{\mathbf{b}}_t^T \boldsymbol{\Sigma}_t^{-1} \mathbf{x}_t + \mathbf{r}_t^T \hat{\mathbf{b}}_t \hat{x}_1 \end{aligned}$$

761 Thus,

$$\dot{y}_t = \frac{\hat{\mathbf{b}}_t^T \boldsymbol{\Sigma}_t^{-1} \mathbf{x}_t + \hat{x}_1 \mathbf{r}_t^T \hat{\mathbf{b}}_t}{\gamma_t} - y_t \frac{\dot{\gamma}_t}{\gamma_t}. \quad (37)$$

762 Recall that  $\gamma_t = \boldsymbol{\mu}_t^T \boldsymbol{\Sigma}_t^{-1} \boldsymbol{\mu}_t$  and  $\dot{\gamma}_t = 2 \hat{\mathbf{b}}_t^T \boldsymbol{\Sigma}_t^{-1} \boldsymbol{\mu}_t$ . Also note that

$$\mathbf{r}_t^T \hat{\mathbf{b}}_t = \boldsymbol{\mu}_t^T \boldsymbol{\Sigma}_t^{-1} \hat{\mathbf{b}}_t.$$

763 Thus, the final expression becomes

$$\dot{y}_t = \frac{\hat{\mathbf{b}}_t^T \boldsymbol{\Sigma}_t^{-1} \mathbf{x}_t + \hat{x}_1 \boldsymbol{\mu}_t^T \boldsymbol{\Sigma}_t^{-1} \hat{\mathbf{b}}_t}{\boldsymbol{\mu}_t^T \boldsymbol{\Sigma}_t^{-1} \boldsymbol{\mu}_t} - y_t \frac{2 \hat{\mathbf{b}}_t^T \boldsymbol{\Sigma}_t^{-1} \boldsymbol{\mu}_t}{\boldsymbol{\mu}_t^T \boldsymbol{\Sigma}_t^{-1} \boldsymbol{\mu}_t} \quad (38)$$

$$= \underbrace{\frac{\hat{\mathbf{b}}_t^T \boldsymbol{\Sigma}_t^{-1}}{\boldsymbol{\mu}_t^T \boldsymbol{\Sigma}_t^{-1} \boldsymbol{\mu}_t} \mathbf{x}_t}_{\mathbf{e}_t} + \frac{\boldsymbol{\mu}_t^T \boldsymbol{\Sigma}_t^{-1} \hat{\mathbf{b}}_t}{\boldsymbol{\mu}_t^T \boldsymbol{\Sigma}_t^{-1} \boldsymbol{\mu}_t} \hat{x}_1 - \frac{2 \hat{\mathbf{b}}_t^T \boldsymbol{\Sigma}_t^{-1} \boldsymbol{\mu}_t}{\boldsymbol{\mu}_t^T \boldsymbol{\Sigma}_t^{-1} \boldsymbol{\mu}_t} y_t \quad (39)$$

764 The first term is essentially one kind of linear combination of  $\mathbf{x}_t$ , and Recall that  $y_t = \mathbf{r}_t^T \mathbf{x}_t :=$

765  $\frac{\boldsymbol{\mu}_t^T \boldsymbol{\Sigma}_t^{-1}}{\boldsymbol{\mu}_t^T \boldsymbol{\Sigma}_t^{-1} \boldsymbol{\mu}_t} \mathbf{x}_t$  which is another linear combination of  $\mathbf{x}_t$ . Assume that  $\mathbf{x}_t \sim \mathcal{N}(\boldsymbol{\mu}_t \hat{x}_1, \boldsymbol{\Sigma}_t)$ , thus, one can

766 derive the relationship between the first term and  $y_t$ . Thus, according to Lemma H.1

$$\frac{\hat{\mathbf{b}}_t^T \boldsymbol{\Sigma}_t^{-1}}{\boldsymbol{\mu}_t^T \boldsymbol{\Sigma}_t^{-1} \boldsymbol{\mu}_t} \mathbf{x}_t = \mathbf{e}_t^T \left[ \mathbf{I} - \frac{\boldsymbol{\Sigma}_t \mathbf{r}_t \mathbf{r}_t^T}{\mathbf{r}_t^T \boldsymbol{\Sigma}_t \mathbf{r}_t} \right] \boldsymbol{\mu}_t \hat{x}_1 + \frac{\mathbf{e}_t^T \boldsymbol{\Sigma}_t \mathbf{r}_t}{\mathbf{r}_t^T \boldsymbol{\Sigma}_t \mathbf{r}_t} y_t + \mathbf{e}_t^T \mathbf{L}_t \boldsymbol{\epsilon}_\perp, \quad (40)$$

$$\boldsymbol{\epsilon}_\perp \sim \mathcal{N}(\mathbf{0}, \mathbf{I}_d - \mathbf{L}_t^T \mathbf{r}_t \mathbf{r}_t^T \mathbf{L}_t / \mathbf{r}_t^T \boldsymbol{\Sigma}_t \mathbf{r}_t). \quad (41)$$

767 Thus, by plugging in the expression, one can get:

$$\dot{y}_t = \alpha_t y_t + \beta \hat{x}_1 + \mathbf{e}_t^T \mathbf{L}_t \boldsymbol{\epsilon}_\perp \quad (42)$$

$$\approx \alpha_t y_t + \beta x_\theta + \mathbf{e}_t^T \mathbf{L}_t \boldsymbol{\epsilon}_\perp \quad (43)$$



768 Where,

$$\alpha_t = \frac{\mathbf{e}_t^\top \Sigma_t \mathbf{r}_t}{\mathbf{r}_t^\top \Sigma_t \mathbf{r}_t} - \frac{2 \hat{\mathbf{b}}_t^\top \Sigma_t^{-1} \boldsymbol{\mu}_t}{\boldsymbol{\mu}_t^\top \Sigma_t^{-1} \boldsymbol{\mu}_t} \quad (44)$$

$$\beta_t = \frac{\boldsymbol{\mu}_t^\top \Sigma_t^{-1} \hat{\mathbf{b}}_t}{\boldsymbol{\mu}_t^\top \Sigma_t^{-1} \boldsymbol{\mu}_t} + \mathbf{e}_t^\top \left[ \mathbf{I} - \frac{\Sigma_t \mathbf{r}_t \mathbf{r}_t^\top}{\mathbf{r}_t^\top \Sigma_t \mathbf{r}_t} \right] \boldsymbol{\mu}_t \quad (45)$$

$$w_t^{(i)} = (\mathbf{e}_t^\top \mathbf{L}_t)^{(i)} \quad (46)$$

769

□

## 770 C Experiment Details

771 Here we elaborate more on experiment details.

### 772 C.1 EDM and EDM2

773 For the baselines on EDM and EDM2 codebase, we directly use the code provide in DPM-Solver-  
774 v3[36]. For the fair comparision, for all baselines, we controlled  $\sigma_{\min} = 0.002$  and  $\sigma_{\max} = 80$  as  
775 suggested in the original EDM and EDM2 paper.

776 For DPM-Solver++, we did abalation search over order  $\in [1, 2, 3]$ , discretization  $\in$   
777 [logSNR, time uniform, , edm, time quadratic].

778 For UniPC, we did abalation search over order  $\in [1, 2, 3]$ , discretization  $\in$   
779 [logSNR, time uniform, , edm, time quadratic], variant  $\in [\text{bh1}, \text{bh2}]$ .

780 For all the ablation results, please see the supplementary material.

### 781 C.2 Stable Diffusion 3

782 For stable diffusion 3, we simply plug in the implementation of all the baselines provided in the  
783 Diffuser. We use latest HpsV2.1 to evaluate generate dresults.

## 784 D Additional Plots

### 785 D.1 General $N$ variable dynamics

786 This section is not referenced in the main paper and will be removed soon; it is retained only for now  
787 to keep the appendix numbering aligned with the main paper.

## 788 E Detailed Explanations

### 789 E.1 Explicit form of $\mathbf{A}_t$ and $\mathbf{b}_t$

790 Here we demonstrate the  $\mathbf{A}_t$  and  $\mathbf{b}_t$  used in AGM[6] and CLD[9]. Here we abuse the notation and  
inherent the notation from CLD.

Table 1: Comparison of different solvers

| Algorithm | $\mathbf{A}_t$                                                         | $\mathbf{b}$             | $F_t$                                                                                    |
|-----------|------------------------------------------------------------------------|--------------------------|------------------------------------------------------------------------------------------|
| AGM[9]    | $\begin{bmatrix} 0 & 1 \\ 0 & 0 \end{bmatrix}$                         | $[0, 1]^\top$            | $\frac{-4}{t-1} \left( \frac{x1 - \mathbf{x}_t^{(0)}}{1-t} - \mathbf{x}_t^{(1)} \right)$ |
| CLD[9]    | $\begin{bmatrix} 0 & -M^{-1} \\ 1 & \Gamma M^{-1} \end{bmatrix} \beta$ | $[0, \Gamma \beta]^\top$ | $\nabla_{\mathbf{x}_t^{(1)}} \log p(\mathbf{x}, t)$                                      |

791

## 792 E.2 Explicit form of mean and covariance matrix

793 Here we first quickly derive how the  $F$  derived which is straight-forward. We know  $x_t^{(0)} := x_t$  be  
 794 the position and define higher derivatives recursively

$$x_t^{(k)} = \frac{d^k x_t^{(0)}}{dt^k}, \quad k = 1, \dots, N-1.$$

795 The system dynamics form an  $N$ th-order chain of integrators driven by a scalar input  $F(t, \mathbf{x}_t)$ :

$$\begin{aligned} \dot{x}_t^{(0)} &= x_t^{(1)}, \\ \dot{x}_t^{(1)} &= x_t^{(2)}, \\ &\vdots \\ \dot{x}_t^{(N-2)} &= x_t^{(N-1)}, \\ \dot{x}_t^{(N-1)} &= F(t, \mathbf{x}_t). \end{aligned} \tag{47}$$

796 Equivalently, the position satisfies the scalar ODE

$$\boxed{\frac{d^N x_t^{(0)}}{dt^N} = F(t, \mathbf{x}_t)}.$$

797 Our goal is starting at some time  $t \in [0, 1)$  with known state  $\{x_t^{(k)}\}_{k=0}^{N-1}$ , choose  $F$  so that the  
 798 position reaches a prescribed value at  $t = 1$ :

$$x_1^{(0)} = x_1 \quad (\text{“hit the target”}).$$

799 Assume  $F$  is held constant over the remaining interval  $[t, 1]$ . Repeated integration yields the degree- $N$   
 800 Taylor polynomial about  $t$ :

$$x_1^{(0)} = \sum_{k=0}^{N-1} \frac{(1-t)^k}{k!} x_t^{(k)} + \frac{(1-t)^N}{N!} F. \tag{48}$$

801 Thus, one can simply solve the  $F$  by Rearranging (48) to isolate  $F$ :

$$F = \frac{N!}{(1-t)^N} \left[ x_1 - \sum_{k=0}^{N-1} \frac{(1-t)^k}{k!} x_t^{(k)} \right].$$

802 Thanks to the simple form of  $F$ , one can readily write down the mean and covariance of the system.

803 Now we know

$$A = \begin{bmatrix} 0 & 1 & 0 & \dots & 0 \\ 0 & 0 & 1 & \dots & 0 \\ \vdots & \vdots & \ddots & \ddots & \vdots \\ 0 & 0 & \dots & 0 & 1 \\ 0 & 0 & \dots & 0 & 0 \end{bmatrix}, \quad \mathbf{b}_t = [0, \dots, 0, 1]^\top.$$

804 By rearranging the dynamics, gives the *linear* time-varying closed loop

$$\dot{\mathbf{x}}_t = \underbrace{\hat{\mathbf{A}}_t}_{A \text{ w/ control}} \mathbf{x}_t + \underbrace{\hat{\mathbf{b}}}_{b \text{ w/ control}} x_1 \tag{49}$$

805 We need first compute the transition matrix induced by  $\hat{\mathbf{A}}_t$  and we call it controlled transition matrix.

806 By Solving  $\dot{\Phi} = \hat{\mathbf{A}}_t \Phi$  column-wise gives the polynomial matrix

$$\Phi(t, 0) = [T_{k,m}(t)]_{k,m=0}^{N-1}, \quad T_{k,m}(t) = \begin{cases} \frac{t^{m-k}}{(m-k)!} - \frac{N! t^{N-k}}{(N-k)! m!}, & m \geq k, \\ -\frac{N! t^{N-k}}{(N-k)! m!}, & m < k. \end{cases}$$

807 Plugging this  $\Phi(t, 0)$  into the boxed formulas above supplies  $\mu(t)$  and  $\Sigma(t)$  explicitly for *every* order  
808  $N$ .

809 Let  $\mu(t) = \mathbb{E}[\mathbf{x}_t]$ . Because  $\hat{\mathbf{b}}_t x_1$  is deterministic,

$$\dot{\mu}(t) = \hat{\mathbf{A}}_t \mu(t) + \hat{\mathbf{b}}_t x_1, \quad \mu(0) = \mu_0. \quad (50)$$

810 Define the state–transition matrix  $\Phi(t, \tau)$  of  $\hat{\mathbf{A}}_t$ :

$$\dot{\Phi}(t, \tau) = \hat{\mathbf{A}}_t \Phi(t, \tau), \quad \Phi(\tau, \tau) = I.$$

811 Then the standard variation-of-constants formula gives

$$\mu_t = \Phi(t, 0) \mu_0 + \int_0^t \Phi(t, \tau) \hat{\mathbf{b}}_\tau x_1 d\tau.$$

812 If the initial derivatives are i.i.d.  $\mathcal{N}(0, 1)$ , then  $\mu_0 = \mathbf{0}$  and only the integral term remains. Carrying  
813 out the integral (polynomials of  $\tau$ ) yields

$$\mu_t^{(k)} = \frac{N! t^{N-k}}{(N-k)!} x_1, \quad k = 0, \dots, N-1.$$

814 Meanwhile, the propagation of covariance matrix is:

$$\dot{\Sigma}_t = \hat{\mathbf{A}}_t \Sigma_t + \Sigma_t \hat{\mathbf{A}}_t^\top, \quad \Sigma(0) = \Sigma_0. \quad (51)$$

815 Eq 51 is a homogeneous Lyapunov ODE whose unique solution is exactly (see Appendix G for more  
816 details):

$$\Sigma_t = \Phi(t, 0) \Sigma_0 \Phi(t, 0)^\top.$$

### 817 E.3 Previous Fast Solver

Table 2: Comparison of different solvers

|                  | Order type        | Order | Multistep type  | Expansion term    | Discretize space |
|------------------|-------------------|-------|-----------------|-------------------|------------------|
| Heun[17]         | Single Step       | 2     | N/A             | N/A               | $\sigma_t$       |
| DEIS[33]         | Multi-step        | 2/3/4 | Adams–Bashforth | $\epsilon_\theta$ | $\sigma_t$       |
| DPM-Solver[22]   | Multi/Single-step | 2/3/4 | Adams–Bashforth | $\epsilon_\theta$ | Optional         |
| DPM-Solver++[23] | Multi/Single-step | 2/3/4 | Adams–Bashforth | $x_\theta$        | Optional         |
| UniPC[34]        | Multi-step        | 3/4/5 | Adams–Moulton   | $x_\theta$        | Optional         |
| TADA(ours)       | Multi-step        | 2/3   | Adams–Bashforth | $F_\theta$        | $t$              |

### 818 E.4 Extended Flow Matching

819 In the framework of flow mathcing, one obtain the velocity by  $v_t = \frac{x_1 - x_t}{1-t}$  because it is the linear  
820 interpolation between data  $x_1$  and prior  $x_0$ . And meanwhile, it happens to be the solution of optimal  
821 control problem:

$$\min_{v_t} \int_t^1 \|v_t\|_2^2 dt, \quad s.t. \quad dx_t = v_t dt \quad (52)$$

822 For the detailed derivation, please see Sec.C.1 in [6].

823 For AGM, they consider a momentum system, which reads

$$\min_{a_t} \int_t^1 \|a_t\|_2^2 dt, \quad s.t. \quad dx_t = v_t dt, \quad dv_t = a_t dt + dw_t \quad (53)$$

824 The differences is that, AGM consider the injection of stochasticity in the velocity channel. For our  
 825 case, the  $F_\theta$  derived in Sec.3.2 is the solution for

$$\begin{aligned} \min_{F_t} \int_t^1 \|F_t\|_2^2 dt \\ dx_t^{(0)} &= x_t^{(1)} dt \\ dx_t^{(1)} &= x_t^{(2)} dt \\ &\dots \\ dx_t^{(N-1)} &= F_t dt \end{aligned}$$

826 and its spirit keeps same as previous formulation, move  $x_t^{(0)}$  to  $x_1^0 \sim p_{\text{data}}$  from  $t = 0$  to  $t = 1$ .

## 827 E.5 Degenerate Case of TADA

828 Here we discuss about the degenerated case of TADA. The reasoning behind it is rather simple. We  
 829 show the dynamics of  $y_t$  (eq.39) again here,

$$\dot{y}_t = \underbrace{\frac{\hat{\mathbf{b}}_t^T \Sigma_t^{-1}}{\boldsymbol{\mu}_t^T \Sigma_t^{-1} \boldsymbol{\mu}_t}}_{\mathbf{e}_t} \mathbf{x}_t + \frac{\boldsymbol{\mu}_t^T \Sigma_t^{-1} \hat{\mathbf{b}}_t}{\boldsymbol{\mu}_t^T \Sigma_t^{-1} \boldsymbol{\mu}_t} x_1 - \frac{2 \hat{\mathbf{b}}_t^T \Sigma_t^{-1} \boldsymbol{\mu}_t}{\boldsymbol{\mu}_t^T \Sigma_t^{-1} \boldsymbol{\mu}_t} y_t \quad (54)$$

830 and recall that

$$y_t = \frac{\boldsymbol{\mu}_t^T \Sigma_t^{-1}}{\boldsymbol{\mu}_t^T \Sigma_t^{-1} \boldsymbol{\mu}_t} \quad (55)$$

831 Thus, if the first term depends exclusively on  $y_t$ , the system reduces to the scalar ODE for  $y_t$  and  
 832 becomes formally identical to other diffusion-model parameterizations such as VP, VE, or FM. More  
 833 precisely, in order to degenerate TADA, one only requires

$$\boldsymbol{\mu}_t \propto \hat{\mathbf{b}}_t \quad (56)$$

834 where  $\hat{\mathbf{b}}_t$  is defined in eq.24. This proportionality holds in two scenarios:

- 835 1. When  $N = 1$ , so that  $\boldsymbol{\mu}_t$  and  $\hat{\mathbf{b}}_t$  are scalars. In that case, the framework collapses to flow  
 836 matching—a mere reparameterization of the diffusion model.
- 837 2. When  $\mathbf{A}_t$  is diagonal and its components evolve independently. Then every dimension of  $\boldsymbol{\mu}_t$  and  
 838  $\hat{\mathbf{b}}_t$  shares the same mean and variance, and proportionality follows directly.

839 A simple empirical check is to propagate the model from different random initializations using our  
 840 formulation: it yields identical FID scores after generation, confirming the degeneracy.

## 841 F Additional Qualitative Comparison

842 Please see fig.10 and fig.9

## 843 G Solution of the homogeneous Lyapunov ODE

844 Let  $\Phi(t, \tau)$  be the *state–transition matrix* of the (possibly time–varying) coefficient  $A_t$ :

$$\dot{\Phi}(t, \tau) = A_t \Phi(t, \tau), \quad \Phi(\tau, \tau) = I.$$

845 Throughout we abbreviate  $\Phi(t, 0) \equiv \Phi(t)$ .

846 **1. Candidate solution.** Consider

$$\Sigma(t) = \Phi(t) \Sigma_0 \Phi(t)^\top.$$

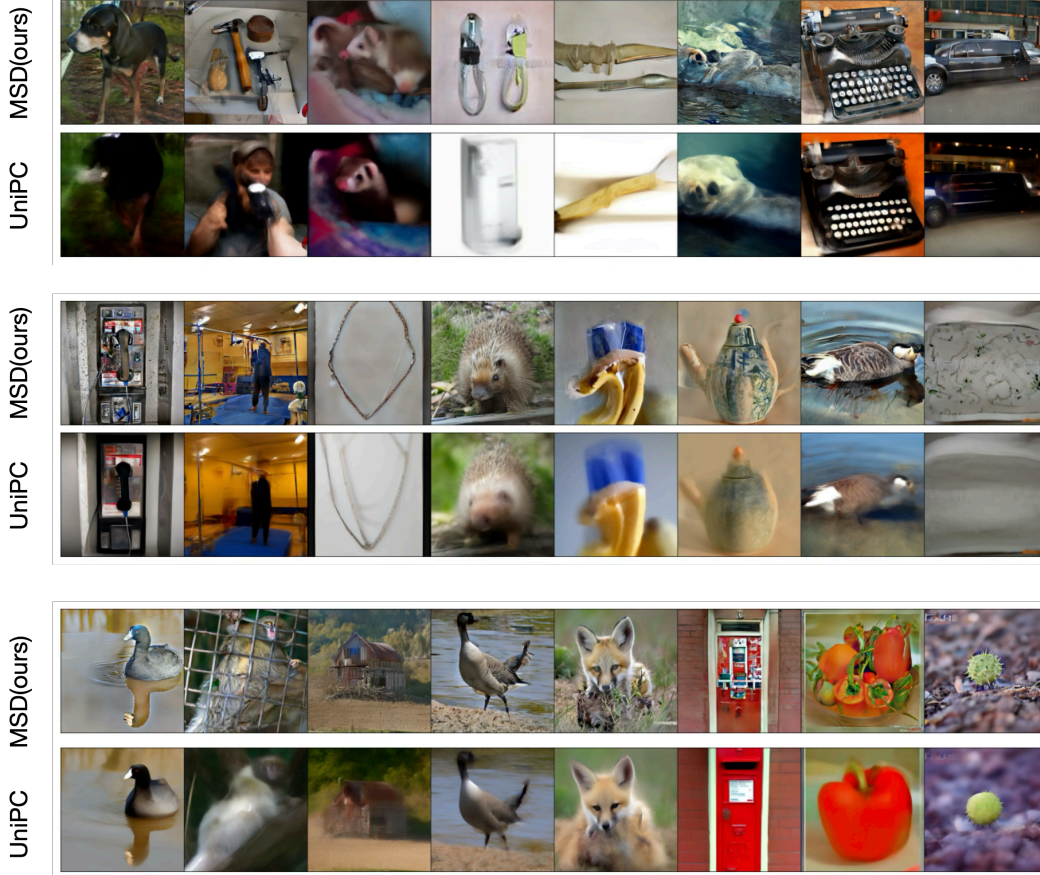

Figure 9: Additional Visual comparison with UniPC using EDM2 w/ 5 NFEs.

847 **2. Verification.** Differentiate previous equation and use the product rule together with  $\dot{\Phi}(t) =$   
 848  $A_t \Phi(t)$  and  $\frac{d}{dt} \Phi(t)^\top = \Phi(t)^\top A_t^\top$ :

$$\begin{aligned} \dot{\Sigma}(t) &= \dot{\Phi} \Sigma_0 \Phi^\top + \Phi \Sigma_0 \dot{\Phi}^\top \\ &= A_t \Phi \Sigma_0 \Phi^\top + \Phi \Sigma_0 \Phi^\top A_t^\top \\ &= A_t \Sigma(t) + \Sigma(t) A_t^\top. \end{aligned}$$

849 Hence  $\Sigma(t)$  satisfies the differential equation in (Lyap), and  $\Sigma(0) = \Phi(0) \Sigma_0 \Phi(0)^\top = \Sigma_0$ .

850 **3. Uniqueness.** Lyapunov Equation is linear in the matrix variable  $\Sigma$ ; by the Picard–Lindelöf  
 851 theorem its solution is unique. Therefore (S) is *the* solution.

## 852 H Correlation between two Gaussian Variable

853 **Lemma H.1.** Let the random vector

$$\mathbf{x}_t \sim \mathcal{N}(\boldsymbol{\mu}_t, \boldsymbol{\Sigma}_t), \quad \boldsymbol{\Sigma}_t = \mathbf{L}_t \mathbf{L}_t^\top \quad (\text{Cholesky factorisation}).$$

854 For two fixed column-vectors  $\mathbf{r}, \mathbf{e} \in \mathbb{R}^d$  set

$$y_t := \mathbf{r}_t^\top \mathbf{x}_t, \quad z_t := \mathbf{e}_t^\top \mathbf{x}_t.$$

855 Write the convenient abbreviations

$$c_t := \mathbf{r}_t^\top \boldsymbol{\mu}_t, \quad d_t := \mathbf{e}_t^\top \boldsymbol{\mu}_t, \quad \mathbf{g}_t := \mathbf{L}_t^\top \mathbf{r}_t, \quad \mathbf{h}_t := \mathbf{L}_t^\top \mathbf{e}_t, \quad \sigma_y^2 := \|\mathbf{g}_t\|^2.$$

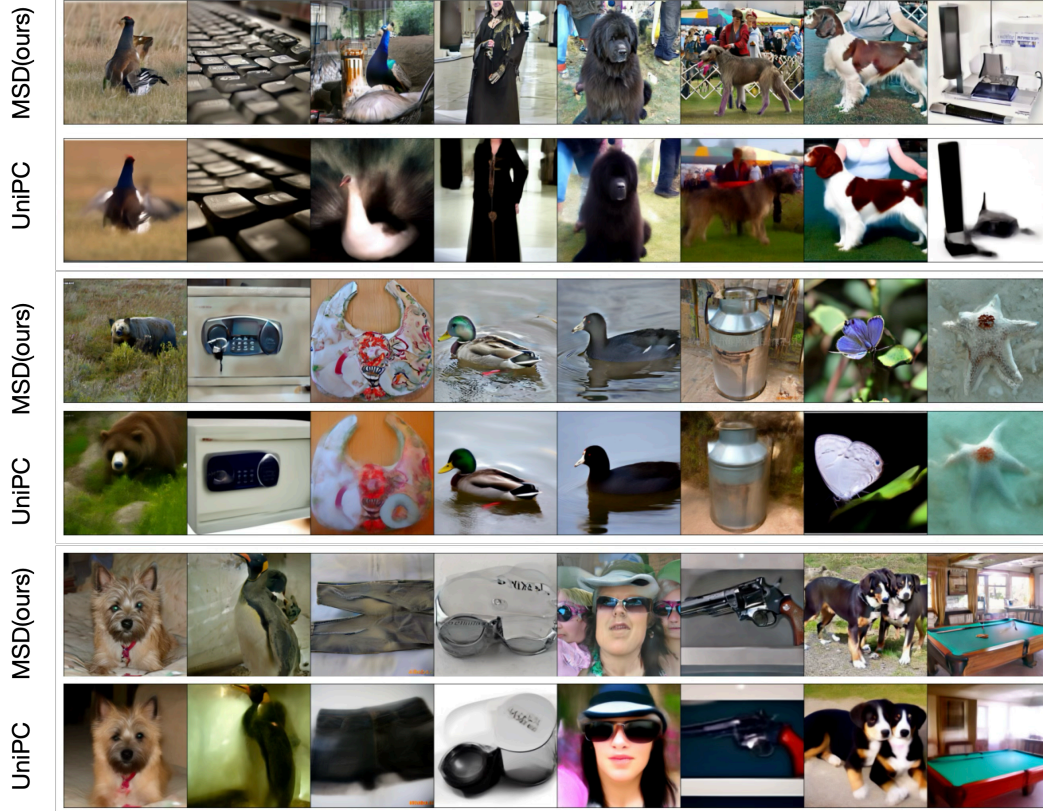

Figure 10: Additional Visual comparison with UniPC using EDM2 w/ 5 NFEs.

856 *Then*

$$z_t = \mathbf{e}_t^\top \left[ \mathbf{I} - \frac{\Sigma_t \mathbf{r}_t \mathbf{r}_t^\top}{\mathbf{r}_t^\top \Sigma_t \mathbf{r}_t} \right] \mu_t x_1 + \frac{\mathbf{e}_t^\top \Sigma_t \mathbf{r}_t}{\mathbf{r}_t^\top \Sigma_t \mathbf{r}_t} y_t + \mathbf{e}_t^\top \mathbf{L}_t \epsilon_\perp, \quad \epsilon_\perp \sim \mathcal{N}(\mathbf{0}, I_d - \mathbf{L}_t^\top \mathbf{r}_t \mathbf{r}_t^\top \mathbf{L}_t / \mathbf{r}_t^\top \Sigma_t \mathbf{r}_t).$$

*Proof.*

$$y_t = c_t + \mathbf{g}_t^\top \epsilon, \quad z_t = d_t + \mathbf{h}_t^\top \epsilon.$$

857 Any vector can be decomposed into the component along  $\mathbf{s}$  and the component orthogonal to  $\mathbf{s}$ :

$$\epsilon = \frac{\mathbf{g}_t}{\sigma_y^2} (\mathbf{g}_t^\top \epsilon) + \epsilon_\perp, \quad \mathbf{g}_t^\top \epsilon_\perp = 0$$

858 Because  $\epsilon \sim \mathcal{N}(\mathbf{0}, I_d)$  and the projector onto  $\mathbf{g}_t$  is orthogonal to the projector onto the complement,  
859  $\mathbf{g}_t^\top \epsilon$  and  $\epsilon_\perp$  are independent Gaussian variables.

860 Insert  $\mathbf{g}_t^\top \epsilon = y_t - c_t$  to obtain

$$\epsilon = \frac{\mathbf{g}_t}{\sigma_y^2} (y_t - c_t) + \epsilon_\perp, \quad \epsilon_\perp \sim \mathcal{N}(\mathbf{0}, I_d - \mathbf{g}_t \mathbf{g}_t^\top / \sigma_y^2).$$



861 Then we can plug this into  $z_t$ :

$$z_t = d_t + \mathbf{h}_t^\top \left( \frac{\mathbf{g}_t}{\sigma_y^2} (y_t - c_t) + \boldsymbol{\epsilon}_\perp \right) \quad (57)$$

$$= \mathbf{e}_t^\top \boldsymbol{\mu}_t x_1 + \frac{\mathbf{h}_t^\top \mathbf{g}_t}{\sigma_y^2} (y_t - c_t) + \mathbf{h}_t^\top \boldsymbol{\epsilon}_\perp \quad (58)$$

$$= \mathbf{e}_t^\top \boldsymbol{\mu}_t x_1 + \frac{\mathbf{h}_t^\top \mathbf{g}_t}{\sigma_y^2} y_t - \frac{\mathbf{h}_t^\top \mathbf{g}_t \mathbf{r}_t^\top \boldsymbol{\mu}_t}{\sigma_y^2} x_1 + \mathbf{h}_t^\top \boldsymbol{\epsilon}_\perp \quad (59)$$

$$= \mathbf{e}_t^\top \boldsymbol{\mu}_t x_1 + \frac{\mathbf{e}_t^\top \boldsymbol{\Sigma}_t \mathbf{r}_t}{\mathbf{r}_t^\top \boldsymbol{\Sigma}_t \mathbf{r}_t} y_t - \frac{\mathbf{e}_t^\top \boldsymbol{\Sigma}_t \mathbf{r}_t}{\mathbf{r}_t^\top \boldsymbol{\Sigma}_t \mathbf{r}_t} (\mathbf{r}_t^\top \boldsymbol{\mu}_t) x_1 + \mathbf{e}_t^\top \mathbf{L}_t \boldsymbol{\epsilon}_\perp \quad (60)$$

$$= \mathbf{e}_t^\top \left[ \mathbf{I} - \frac{\boldsymbol{\Sigma}_t \mathbf{r}_t \mathbf{r}_t^\top}{\mathbf{r}_t^\top \boldsymbol{\Sigma}_t \mathbf{r}_t} \right] \boldsymbol{\mu}_t x_1 + \frac{\mathbf{e}_t^\top \boldsymbol{\Sigma}_t \mathbf{r}_t}{\mathbf{r}_t^\top \boldsymbol{\Sigma}_t \mathbf{r}_t} y_t + \mathbf{e}_t^\top \mathbf{L}_t \boldsymbol{\epsilon}_\perp \quad (61)$$

862

□

## 863 I General $N$ variable MDM loss

864 At time  $t$  the  $N$ -variables are generated by

$$\boxed{\mathbf{x}_t = \boldsymbol{\mu}_t x_1 + \mathbf{L}_t \boldsymbol{\epsilon}} \quad \boldsymbol{\epsilon} \sim \mathcal{N}(\mathbf{0}, I_N),$$

865 with known  $\boldsymbol{\mu}_t \in \mathbb{R}^N$  and invertible  $\mathbf{L}_t \in \mathbb{R}^{N \times N}$ . The goal is to predict  $\boldsymbol{\epsilon}^{(N-1)}$ .

866 By whitening trick, one can isolate  $\boldsymbol{\epsilon}^{(N-1)}$ . Let  $\mathbf{e}_{N-1}^\top = [0, \dots, 0, 1]$  be the row vector that selects  
867 the last coordinate. Left-multiplying by  $\mathbf{e}_{N-1}^\top \mathbf{L}_t^{-1}$  gives

$$\mathbf{e}_{N-1}^\top \mathbf{L}_t^{-1} \mathbf{x}_t = \mathbf{e}_{N-1}^\top \mathbf{L}_t^{-1} \boldsymbol{\mu}_t x_1 + \underbrace{\mathbf{e}_{N-1}^\top \mathbf{L}_t^{-1} \mathbf{L}_t}_{I_N} \boldsymbol{\epsilon}.$$

868 Define the *time-dependent scalars*

$$\mathbf{a}_t^\top := \mathbf{e}_{N-1}^\top \mathbf{L}_t^{-1} \in \mathbb{R}^N, \quad b_t := \mathbf{a}_t^\top \boldsymbol{\mu}_t \neq 0,$$

869 then

$$\boldsymbol{\epsilon}^{(N-1)} = \mathbf{a}_t^\top \mathbf{x}_t - b_t x_1. \quad (62)$$

870 A neural network  $\varepsilon_\theta(\mathbf{x}_t, t)$  is trained to approximate  $\boldsymbol{\epsilon}^{(N-1)}$  with the standard

$$\mathcal{L}_{\text{MDM}}(\theta) := \mathbb{E} \|\varepsilon_\theta(\mathbf{x}_t, t) - \boldsymbol{\epsilon}^{(N-1)}\|_2^2$$

871 Insert eq [62](#) and multiply the interior by  $b_t$ :

$$\begin{aligned} \mathcal{L}_{\text{MDM}}(\theta) &= \mathbb{E} \|\varepsilon_\theta(\mathbf{x}_t, t) - \mathbf{a}_t^\top \mathbf{x}_t + b_t x_1\|_2^2 \\ &\propto \mathbb{E} \|g_\theta(\mathbf{x}_t, t) - x_1\|_2^2 \end{aligned}$$

872 where

$$g_\theta(\mathbf{x}_t, t) := -\frac{\varepsilon_\theta(\mathbf{x}_t, t) - \mathbf{a}_t^\top \mathbf{x}_t}{b_t}$$
